# Supplementary material
Source: ML conference proceedings conference paper supplement (https://proceedings.mlr.press/v80/sen18a.html)
Supplement: Supplementary file [file sen18a-supp.pdf]

## A. Guarantees with known $(\nu_*, \rho_*)$

In this section we prove that if Algorithm 1 is run with the parameters  $(\nu_*, \rho_*)$ , then it terminates with an  $x_\Lambda$  that is close to optimal.

Recall that  $\nu > \nu_*$  and  $\rho > \rho_*$ . Consider a cell  $\mathcal{P}_{h, i_h^*}$  at height  $h$  such that  $x^* \in \mathcal{P}_{h, i_h^*}$ . From Assumption 1 we have that:

$$\begin{aligned} b_{h, i_h^*} &= f_{z_h}(x_{h, i_h^*}) + \zeta(z_h) + \nu\rho^h \\ &\geq f(x_{h, i_h^*}) + \nu\rho^h \geq f^* \end{aligned} \quad (5)$$

Therefore, any node  $(h, i)$  such that  $b_{h, i} < f^*$  will never be expanded. Therefore, the nodes at height  $h$  that are expanded form a subset of  $G_h$  defined below:

$$G_h \triangleq \{\text{nodes } (h, i) \text{ such that } f_{z_h}(x_{h, i}) + \nu\rho^h + \zeta_{z_h}(x_{h, i}) \geq f^*\}.$$

By definition of  $z_h$  we have that,

$$G_h \subseteq \{\text{nodes } (h, i) \text{ such that } f_{z_h}(x_{h, i}) + 2\nu\rho^h \geq f^*\}.$$

Therefore, by Assumption 1 and Definition 1 we have the following lemma.

**Lemma 1.** *We have  $|G_h| \leq C(\nu, \rho)\rho^{-d(\nu, \rho)h}$ .*

We now argue that the tree has to grow to a certain minimum depth given a cost budget  $\Lambda$  in Algorithm 1.

**Lemma 2.** *Let  $h'$  be the biggest number  $h$  such  $\sum_{l=0}^h C(\nu, \rho)K\lambda(z_l)\rho^{-d(\nu, \rho)l} \leq \Lambda$ . The tree in Algorithm 1 grows to a height of at least  $h(\Lambda) = h' + 1$ , and uses a cost budget of at most  $\Lambda + K\lambda(1)$  when it terminates.*

*Proof.* We have shown that only the nodes in  $G = \cup_h G_h$  are expanded. Let us consider the strategy that only expands nodes in  $G$ , but expands the leaf among the current leaves with the least height. This strategy yields the tree with minimum height among strategies that only expand nodes in  $G$ . The cost incurred by this strategy till step  $h'$  is given by,

$$\sum_{l=0}^{h'} C(\nu, \rho)K\lambda(z_l)\rho^{-d(\nu, \rho)l} \leq \Lambda.$$

Since the above cost is less than or equal to  $\Lambda$  another set of children at height  $h' + 1$  is expanded and then the algorithm terminates because of the check in the while loop in step 4 of Algorithm 1. Therefore, the resultant tree has a height of at least  $h' + 1$  and incurs a cost budget of at most  $\Lambda + K\lambda(1)$ .  $\square$

*Proof of Theorem 1.* The proof of Theorem 1 follows naturally from Lemma 2 and the definition of  $G_h$ . Since, a node point  $x_{h'+1, j}$  at height  $h(\Lambda) = h' + 1$  has been evaluated, it means that  $x_{h'+1, j} \in G_{h'+1}$ . Therefore, we have that

$$f(x_{h(\Lambda), j}) \geq f^* - 2\nu\rho^{h(\Lambda)}. \quad (6)$$

$\square$

Now we prove Corollary 1 under Assumptions 2 and 3 separately.

*Proof of Corollary 1.* Consider Algorithm 1 with parameters  $(\nu, \rho)$ .

(i) *Under Assumption 2:* Note that  $\lambda(z_h) \leq \beta h$ . Therefore, we have the following chain,

$$\begin{aligned} \sum_{l=0}^h \lambda(z_l)\rho^{-d(\nu, \rho)l} &\leq \sum_{l=0}^h \beta l \rho^{-d(\nu, \rho)l} \\ &\leq \beta \frac{h\rho^{-d(\nu, \rho)(h+1)}}{\rho^{-d(\nu, \rho)} - 1} \end{aligned}$$

Therefore, from Theorem 1 we have the following,

$$\Lambda \leq C(\nu, \rho)K\beta \frac{h(\Lambda)\rho^{-d(\nu, \rho)(h(\Lambda)+1)}}{\rho^{-d(\nu, \rho)} - 1}.$$

Suppose  $\Lambda$  is large enough such that  $h(\Lambda) \leq \rho^{-\epsilon h(\Lambda)}$  where  $\epsilon$  is a small constant. Then we have the following:

$$\begin{aligned} R_\Lambda &\leq 2\nu\rho^{h(\Lambda)} \\ &\leq 2\nu \left( \frac{C(\nu, \rho)K\beta}{\Lambda(1 - \rho^{d(\nu, \rho)})} \right)^{\frac{1}{d(\nu, \rho) + \epsilon}} \end{aligned}$$

(i) *Under Assumption 3:* Note that  $\lambda(z_h) \leq \gamma^{-h}$ . Therefore, we have the following,

$$\begin{aligned} \sum_{l=0}^h \lambda(z_l)\rho^{-d(\nu, \rho)l} &\leq \frac{\gamma^{-(h+1)}\rho^{-d(\nu, \rho)(h+1)} - 1}{\gamma^{-1}\rho^{-d(\nu, \rho)} - 1} \\ &\leq \frac{\rho^{-(d(\nu, \rho)+1)(h+1)}}{\gamma^{-1}\rho^{-d(\nu, \rho)} - 1} \end{aligned}$$

Therefore, we have that,

$$\begin{aligned} R_\Lambda &\leq 2\nu\rho^{h(\Lambda)} \\ &\leq 2\nu \left( \frac{2C(\nu, \rho)K}{\Lambda(\gamma^{-1}\rho^{-d(\nu, \rho)} - 1)} \right)^{\frac{1}{d(\nu, \rho)+1}} \end{aligned}$$

$\square$

## B. Recovering optimal scaling with unknown smoothness

In this section, we relate the optimality dimension  $d(\nu, \rho)$  to  $d(\nu_*, \rho_*)$  for  $\nu > \nu_*$  and  $\rho > \rho_*$ . These relations are implied by the analysis of Theorem 1 in (Grill et al., 2015).

**Lemma 3.** *Consider the parameters  $\nu > \nu_*$  and  $\rho > \rho_*$ . Let  $h_{min} \triangleq \log(\nu/\nu_*) \log(1/\rho)$ . Then we have the following,*

$$\begin{aligned} & \mathcal{N}_h(2\nu\rho^h) \\ & \leq \max \left( C(\nu_*, \rho_*) K^{(\log \rho_* + \log \nu_* - \log \nu) / \log \rho}, K^{h_{min}} \right) \times \\ & \rho^{-h[d(\nu_*, \rho_*) + \log K(1/\log(1/\rho) - 1/\log(1/\rho_*))]} \end{aligned}$$

*Proof.* It follows directly from the analysis of Theorem 1 in appendix B.1 of (Grill et al., 2015).  $\square$

Lemma 3 implies the following,

$$\begin{aligned} C(\nu, \rho) & \leq \max \left( C(\nu_*, \rho_*) K^{(\log \rho_* + \log(\nu_*/\nu)) / \log \rho}, K^{h_{min}} \right) \\ d(\nu, \rho) & \leq d(\nu_*, \rho_*) + \log K(1/\log(1/\rho) - 1/\log(1/\rho_*)) \end{aligned} \quad (7)$$

## C. Putting it together: Simple Regret Bound

Let  $R_{\Lambda_0}^{\nu, \rho}$  be the simple regret of Algorithm 1 with parameters  $\nu, \rho$ . Note that Algorithm 2 is designed such that its simple regret is equal to at most the simple regret of one of the MFDOO instances spawned. We will analyze Algorithm 2 under Assumptions 2 and 3 separately.

*Proof of Theorem 2.* The proof is divided into two sections corresponding to Assumptions 2 and 3 respectively. Consider  $\rho \geq \rho_*$  and  $\nu \geq \nu_*$ . In this analysis we assume  $d(\nu_*, \rho_*) > 0$ .

*Under Assumption 2:* We have the following chain,

$$\begin{aligned} \log R_{\Lambda_0}^{\nu, \rho} & \leq \log(2\nu) + \frac{\log C(\nu, \rho)}{d(\nu, \rho) + \epsilon} + \frac{\log(K\beta)}{d(\nu, \rho) + \epsilon} \\ & + \frac{\log(1/(1 - \rho^{d(\nu, \rho)}))}{d(\nu, \rho) + \epsilon} - \frac{\log \Lambda_0}{d(\nu, \rho) + \epsilon} \\ & \leq \log(2\nu_{max}) + \frac{\log C(\nu, \rho)}{d(\nu, \rho) + \epsilon} + \frac{\log(K\beta)}{d(\nu_*, \rho_*) + \epsilon} \\ & + \frac{\log(1/(1 - \rho^{d(\nu_*, \rho_*)}))}{d(\nu_*, \rho_*) + \epsilon} \\ & - \frac{\log \Lambda_0}{d(\nu_*, \rho_*) + \epsilon} \left( 1 - \frac{d(\nu, \rho) - d(\nu_*, \rho_*)}{2 + d(\nu_*, \rho_*)} \right) \end{aligned}$$

Let  $\rho_i = \rho_{max}^{N/i}$  for  $i \in \{1, 2, \dots, N\}$ . We define,

$$\bar{\rho} \triangleq \operatorname{argmin}_{i: \rho_i \geq \rho_*} [d(\nu_{max}, \rho_i) - d(\nu_*, \rho_*)]$$

Note that  $\bar{\rho}$  is the best  $\rho_i \geq \rho_*$  that is spawned as a MFDOO instance in Algorithm 2. Thus bounding the regret of  $R_{\Lambda_0}^{\nu_{max}, \bar{\rho}}$  for  $\Lambda_0 = \Lambda/N - \lambda(1)$  immediately yields a simple regret bound for Algorithm 2. Now we observe that,

$$d(\nu_{max}, \bar{\rho}) - d(\nu_*, \rho_*) \leq \frac{D_{max}}{N}.$$

Therefore, we have the following,

$$\begin{aligned} \log R_{\Lambda_0}^{\nu_{max}, \bar{\rho}} & \leq \log(2\nu_{max}) + \frac{\log C(\nu_{max}, \bar{\rho})}{d(\nu_{max}, \bar{\rho}) + \epsilon} + \frac{\log(K\beta)}{d(\nu_*, \rho_*) + \epsilon} \\ & + \frac{\log(1/(1 - \bar{\rho}^{d(\nu_*, \rho_*)}))}{d(\nu_*, \rho_*) + \epsilon} \\ & - \log \Lambda_0 \left( \frac{1}{d(\nu_*, \rho_*) + \epsilon} - \frac{D_{max}/N}{(\epsilon + d(\nu_*, \rho_*))^2} \right) \end{aligned}$$

We can bound the second term as follows,

$$\begin{aligned} \frac{\log C(\nu_{max}, \bar{\rho})}{d(\nu_{max}, \bar{\rho}) + \epsilon} & \leq \frac{\log C(\nu_{max}, \bar{\rho})}{d(\nu_*, \rho_*) + \epsilon} \\ & \leq \frac{1}{d(\nu_*, \rho_*) + \epsilon} \log \max \left( C(\nu_*, \rho_*) K^{(\log \rho_* + \log(\nu_*/\nu)) / \log \rho}, K^{h_{min}} \right) \\ & \leq a + \frac{D_{max}}{d(\nu_*, \rho_*) + \epsilon} \log(\nu_{max}/\nu_*), \end{aligned}$$

where  $a$  is a constant independent of all the parameters. Finally we can bound the last term as follows,

$$\begin{aligned} \log \Lambda_0 \left( -\frac{1}{d(\nu_*, \rho_*) + \epsilon} + \frac{D_{max}/N}{(\epsilon + d(\nu_*, \rho_*))^2} \right) \\ & \leq -\frac{\log \Lambda_0}{d(\nu_*, \rho_*) + \epsilon} + \log \Lambda_0 \frac{2}{\log(\Lambda/\log \Lambda)} \frac{1}{(\epsilon + d(\nu_*, \rho_*))^2} \\ & \leq -\frac{\log \Lambda_0}{d(\nu_*, \rho_*) + \epsilon} + \frac{2}{(\epsilon + d(\nu_*, \rho_*))^2} \end{aligned}$$

where the second inequality follows from the definition of  $N$ . Now, we can finally bound the regret of Algorithm 2 as follows:

$$\begin{aligned} R_{\Lambda_0}^{\nu_{max}, \bar{\rho}} & \leq 2\nu_{max} \exp \left( a + \frac{2}{(\epsilon + d(\nu_*, \rho_*))^2} \right) (\nu_{max}/\nu_*)^{\frac{D_{max}}{\epsilon + d(\nu_*, \rho_*)}} \times \\ & (K\beta/(1 - \bar{\rho}^{d(\nu_*, \rho_*)}))^{1/(\epsilon + d(\nu_*, \rho_*))} \Lambda_0^{-\frac{1}{\epsilon + d(\nu_*, \rho_*)}} \\ & = \mathcal{O} \left( (\nu_{max}/\nu_*)^{\frac{D_{max}}{\epsilon + d(\nu_*, \rho_*)}} \times \right. \\ & \left. \left( \frac{2\Lambda}{K\beta D_{max} \log(\Lambda/\log \Lambda)} - \frac{\lambda(1)}{K\beta} \right)^{-\frac{1}{\epsilon + d(\nu_*, \rho_*)}} \right) \end{aligned}$$

*Under Assumption 3:* Now we prove similar results under the second assumption on the cost and bias function. The analysis is very similar to the first part of the theorem. Note that  $\gamma > \rho_{max}$ . We follow the same notational convention as the first part of the theorem. Proceeding exactly as above, we have the following chain,

$$\begin{aligned} \log R_{\Lambda_0}^{\nu_{max}, \bar{\rho}} &\leq \log(2\nu_{max}/\rho_*) \\ &+ \frac{\log 2C(\nu_{max}, \bar{\rho})}{d(\nu_{max}, \bar{\rho}) + 1} + \frac{\log K}{d(\nu_*, \rho_*) + 1} - \frac{\log(\gamma^{-1}\bar{\rho}^{d(\nu_*, \rho_*)} - 1)}{d(\nu_*, \rho_*) + 1} \\ &- \log \Lambda_0 \left( \frac{1}{d(\nu_*, \rho_*) + 1} - \frac{D_{max}/N}{(1 + d(\nu_*, \rho_*))^2} \right) \\ &\leq \log(2\nu_{max}/\rho_*) + 2a + \frac{2D_{max}}{d(\nu_*, \rho_*) + 1} \log(\nu_{max}/\nu_*) \\ &+ \frac{\log K}{d(\nu_*, \rho_*) + 1} - \frac{\log(\gamma^{-1}\bar{\rho}^{d(\nu_*, \rho_*)} - 1)}{d(\nu_*, \rho_*) + 1} \\ &- \frac{\log \Lambda_0}{d(\nu_*, \rho_*) + 1} + 4 \end{aligned}$$

Thus we get the following regret bound:

$$\begin{aligned} R_{\Lambda_0}^{\nu_{max}, \bar{\rho}} &\leq 2(\nu_{max}/\rho_*) \exp(2a + 4) (\nu_{max}/\nu_*)^{\frac{2D_{max}}{1+d(\nu_*, \rho_*)}} \\ &\times \left( \frac{1}{\gamma^{-1}\bar{\rho}^{d(\nu_*, \rho_*)} - 1} \right)^{1/(1+d(\nu_*, \rho_*))} \Lambda_0^{-\frac{1}{1+d(\nu_*, \rho_*)}} \\ &= \mathcal{O} \left( (\nu_{max}/\nu_*)^{\frac{2D_{max}}{1+d(\nu_*, \rho_*)}} \times \right. \\ &\left. \left( \frac{2\Lambda}{KD_{max} \log(\Lambda/\log \Lambda)} - \frac{\lambda(1)}{K} \right)^{-\frac{1}{1+d(\nu_*, \rho_*)}} \right) \end{aligned}$$

□

## D. Description of Synthetic Functions

The following are the synthetic functions used in the paper (Currin, 1988; Dixon & Szego, 1978).

**Currin exponential function (Currin, 1988):** The domain is the two dimensional unit cube  $\mathcal{X} = [0, 1]^2$  and the fidelity is  $\mathcal{Z} = [0, 1]$ . We used  $\lambda(z) = 0.1 + z^2$ ,  $\sigma^2 = 0.5$  and,

$$\begin{aligned} f_z(x) &= \left( 1 - 0.1(1 - z) \exp\left(\frac{-1}{2x_2}\right) \right) \\ &\left( \frac{2300x_1^3 + 1900x_1^2 + 2092x_1 + 60}{100x_1^3 + 500x_1^2 + 4x_1 + 20} \right). \end{aligned}$$

**Hartmann functions (Dixon & Szego, 1978):** We used  $f_z(x) = \sum_{i=1}^4 (\alpha_i - \alpha'(z)) \exp(-\sum_{j=1}^3 A_{ij}(x_j - P_{ij})^2)$ . Here  $A, P$  are given below for the 3 and 6 dimensional cases and  $\alpha = [1.0, 1.2, 3.0, 3.2]$ . Then  $\alpha'$  was set as  $\alpha'(z) = 0.1(1 - z)$ . We constructed the  $p = 4$  and  $p = 2$  Hartmann functions for the 3 and 6 dimensional cases respectively this way. When  $z = 1$ , this reduces to the

usual Hartmann function commonly used as a benchmark in global optimisation.

For the 3 dimensional case we used  $\lambda(z) = 0.05 + (1 - 0.05)z^3$ ,  $\sigma^2 = 0.01$  and,

$$A = \begin{bmatrix} 3 & 10 & 30 \\ 0.1 & 10 & 35 \\ 3 & 10 & 30 \\ 0.1 & 10 & 35 \end{bmatrix}, \quad P = 10^{-4} \times \begin{bmatrix} 3689 & 1170 & 2673 \\ 4699 & 4387 & 7470 \\ 1091 & 8732 & 5547 \\ 381 & 5743 & 8828 \end{bmatrix}.$$

For the 6 dimensional case we used  $\lambda(z) = 0.05 + (1 - 0.05)z^3$ ,  $\sigma^2 = 0.05$  and,

$$A = \begin{bmatrix} 10 & 3 & 17 & 3.5 & 1.7 & 8 \\ 0.05 & 10 & 17 & 0.1 & 8 & 14 \\ 3 & 3.5 & 1.7 & 10 & 17 & 8 \\ 17 & 8 & 0.05 & 10 & 0.1 & 14 \end{bmatrix},$$

$$P = 10^{-4} \times \begin{bmatrix} 1312 & 1696 & 5569 & 124 & 8283 & 5886 \\ 2329 & 4135 & 8307 & 3736 & 1004 & 9991 \\ 2348 & 1451 & 3522 & 2883 & 3047 & 6650 \\ 4047 & 8828 & 8732 & 5743 & 1091 & 381 \end{bmatrix}.$$

**Branin function (Dixon & Szego, 1978):** We use the following function where  $\mathcal{X} = [[-5, 10], [0, 15]]^2$  and  $\mathcal{Z} = [0, 1]$ .

$$f_z(x) = a(x_2 - b(z)x_1^2 + c(z)x_1 - r)^2 + s(1 - t(z)) \cos(x_1) + s,$$

where  $a = 1$ ,  $b(z) = 5.1/(4\pi^2) - 0.01(1 - z)$ ,  $c(z) = 5/\pi - 0.1(1 - z)$ ,  $r = 6$ ,  $s = 10$  and  $t(z) = 1/(8\pi) + 0.05(1 - z)$ . At  $z = 1$ , this becomes the standard Branin function used as a benchmark in global optimization. We used  $\lambda(z) = 0.05 + z^3$  for the cost function and  $\sigma^2 = 0.05$  for the noise variance.
